# Supplementary material
Source: Springer Nature journal article supplement (https://www.springermedizin.de/resource/supplementary/12981_2012_234_MOESM3_ESM.pdf/9604112)

HCV Ab-negative patients

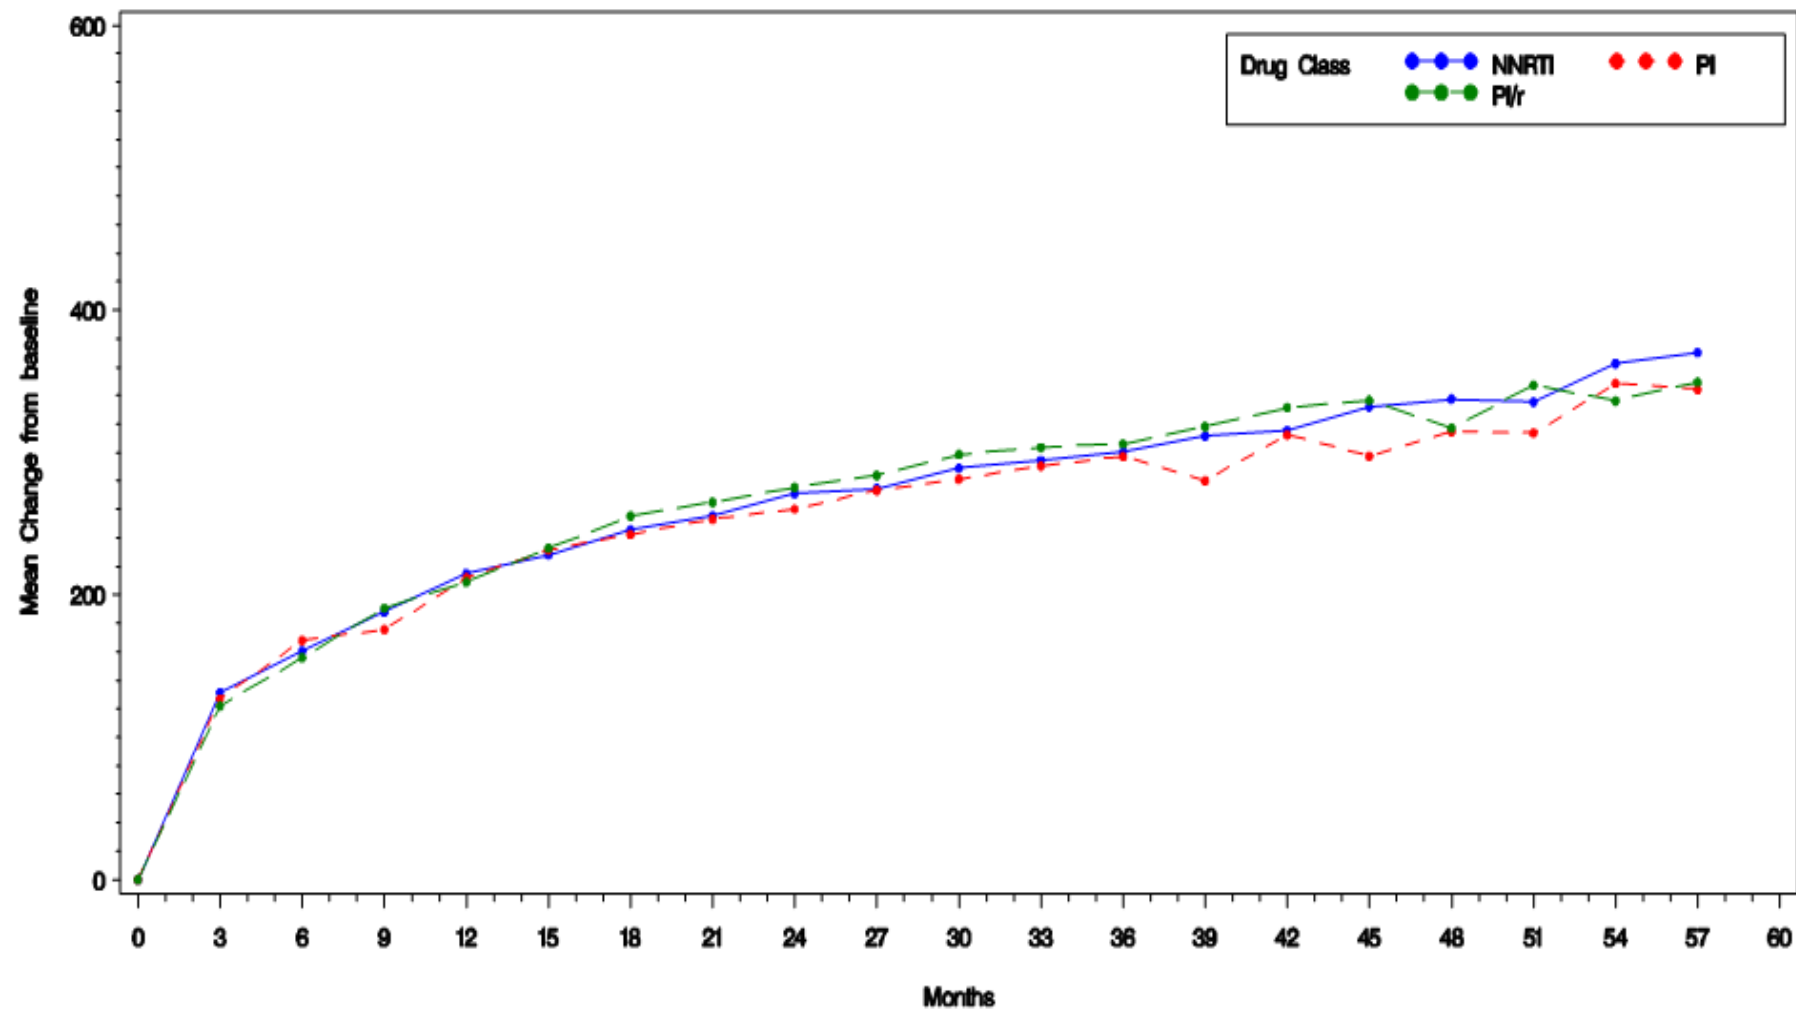

HCV Ab-positive patients

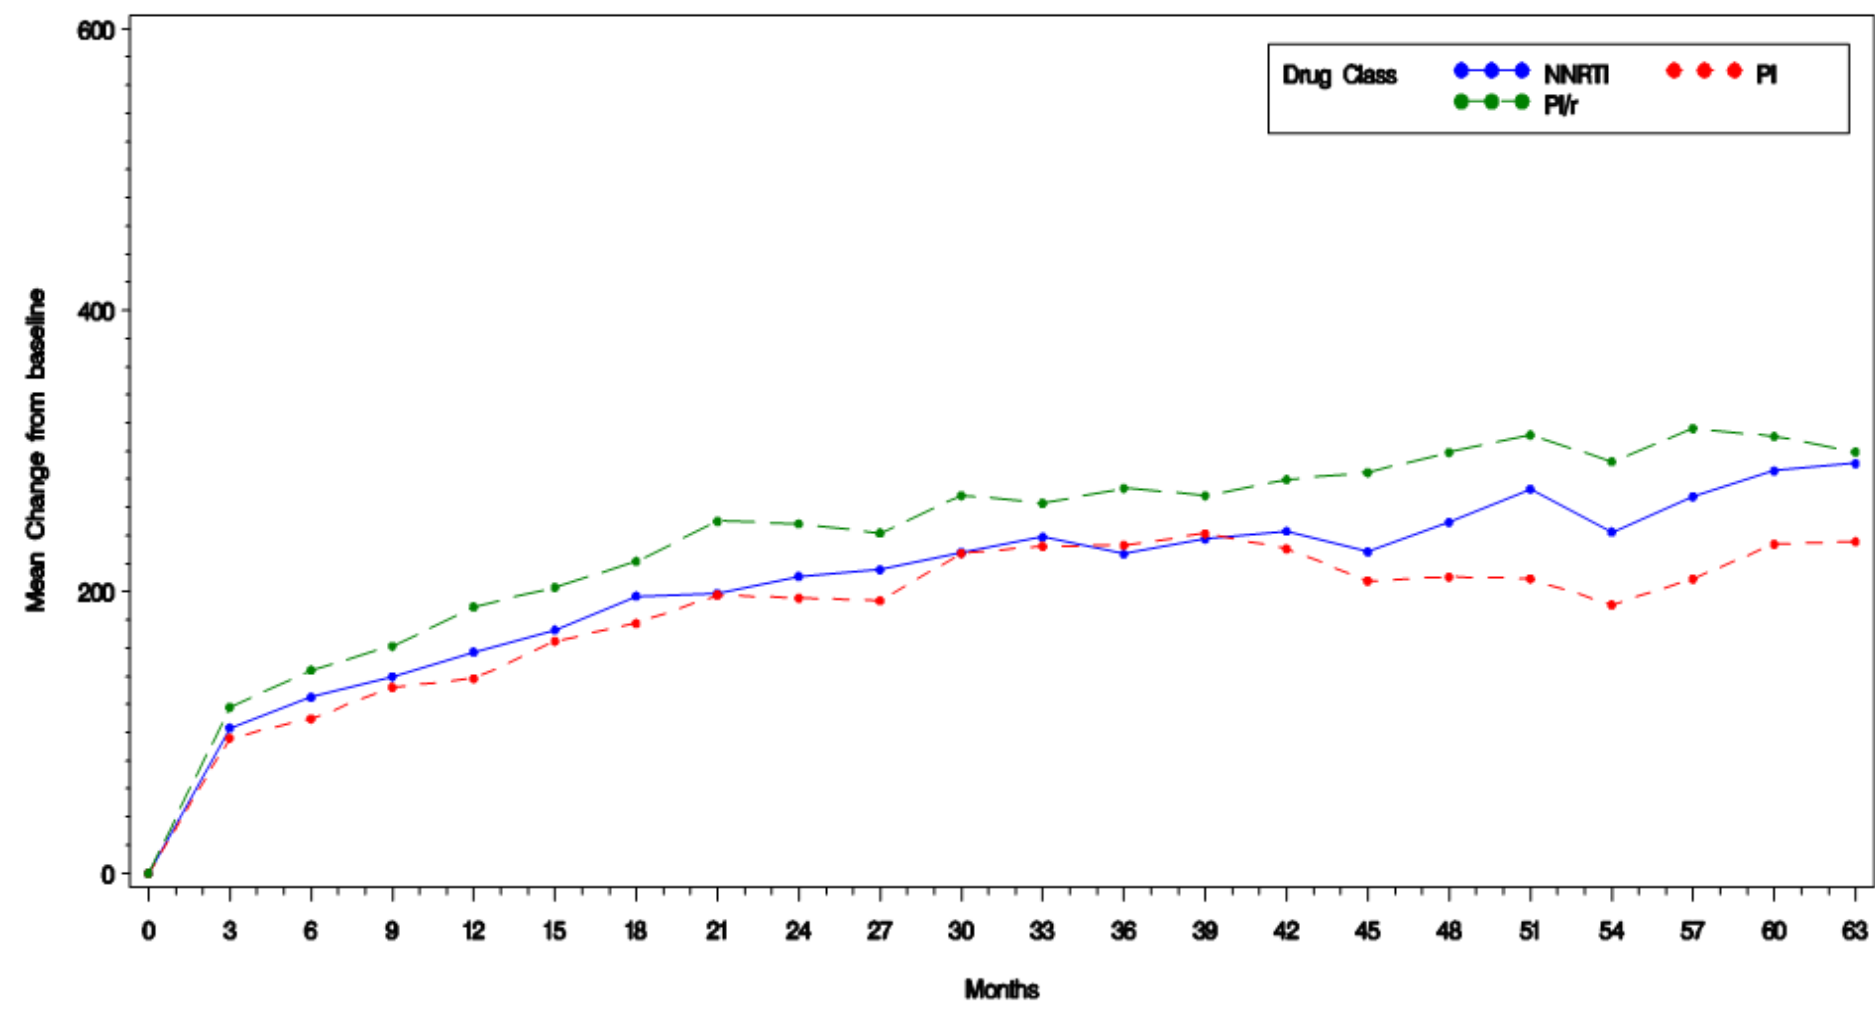

Supplement: MOESM3 [file 9604112]
